# Supplementary material for: Dietary Inflammatory Index and Odds of Colorectal Cancer and Colorectal Adenomatous Polyps in a Case-Control Study from Iran
Source: Nutrients. 2019 May 28;11(6):1213. doi: 10.3390/nu11061213 (PMC6628332; doi:10.3390/nu11061213)
Supplement: Supplementary file 1 [file nutrients-11-01213-s001.pdf]

In the Name of God  
Research Institute of Endocrinology and Metabolism  
Shaheed Beheshti University of Medical Sciences  
Food Frequency Questionnaire (FFQ) "Tehran Lipid and Glucose Study"

Name:

Acceptance Code:

Age:

| No. | DAIRY FOODS                       | HOW MUCH          | HOW OFTEN |          |           |          | CONSIDERATIONS                                           |
|-----|-----------------------------------|-------------------|-----------|----------|-----------|----------|----------------------------------------------------------|
|     |                                   |                   | per day   | per week | per month | per year |                                                          |
| 1   | Lavash bread<br>(refined grains)  | 1 loaf            |           |          |           |          |                                                          |
| 2   | Barbari bread<br>(refined grains) | 1 loaf            |           |          |           |          |                                                          |
| 3   | Sangak bread<br>(whole grains)    | 1 loaf            |           |          |           |          |                                                          |
| 4   | Taftoon bread<br>(refined grains) | 1 loaf            |           |          |           |          |                                                          |
| 5   | Baguette bread                    | 1 loaf            |           |          |           |          |                                                          |
| 6   | Cooked rice                       | 1 dinner plate    |           |          |           |          | normal: full:                                            |
| 7   | Cooked pasta                      | 1 spatula         |           |          |           |          | Flat head: full:                                         |
| 8   | Potato                            | 1 medium          |           |          |           |          |                                                          |
| 9   | French fries                      | 1 slice           |           |          |           |          |                                                          |
| 10  | Baked vermicelli<br>(soup noodle) | 1 cup             |           |          |           |          |                                                          |
| 11  | Ash noodle                        | 1 cup             |           |          |           |          |                                                          |
| 12  | Cookies (stating the<br>type)     | 1 number          |           |          |           |          | type:                                                    |
| 13  | Crackers (crispy<br>biscuits)     | 1 number          |           |          |           |          |                                                          |
| 14  | Types of cakes                    | 1 medium slice    |           |          |           |          | (Including homemade<br>cakes, cookies, T-<br>tops, etc.) |
| 15  | Corn                              | 1 medium          |           |          |           |          |                                                          |
| 16  | Cooked barley or<br>bulgur        | 1 cup             |           |          |           |          |                                                          |
| 17  | Lentil                            | 1 cup             |           |          |           |          |                                                          |
| 18  | Beans                             | 1 cup             |           |          |           |          |                                                          |
| 19  | Pea                               | 1 cup             |           |          |           |          |                                                          |
| 20  | Baked bean                        | 1 cup             |           |          |           |          |                                                          |
| 21  | Soy bean                          | 1 cup             |           |          |           |          |                                                          |
| 22  | Mung                              | 1 cup             |           |          |           |          |                                                          |
| 23  | Cotyledon                         | 1 cup             |           |          |           |          |                                                          |
| 24  | Beef or calf                      | 1 slice of stewed |           |          |           |          |                                                          |
| 25  | lamb meat                         | 1 slice of stewed |           |          |           |          |                                                          |
| 26  | Ground beef                       | 1 tablespoon      |           |          |           |          |                                                          |
| 27  | Hen and Chickens                  | 1 medium piece    |           |          |           |          | Drumstick: chest:                                        |

|    |                                        |                                      |  |  |  |  |                                                        |
|----|----------------------------------------|--------------------------------------|--|--|--|--|--------------------------------------------------------|
|    |                                        |                                      |  |  |  |  | wings: with peel:<br>peeled:                           |
| 28 | Fish (except tuna)<br>stating the type | 1 medium piece<br>(one palm full)    |  |  |  |  | The amount of:<br>type:                                |
| 29 | Tuna (canned)                          | 1/2 cans                             |  |  |  |  | Is it discarded oil?<br>Yes * No *                     |
| 30 | Heart, liver and<br>kidney             | 1 skewer                             |  |  |  |  |                                                        |
| 31 | Hamburger                              | 1 number                             |  |  |  |  |                                                        |
| 32 | kielbasa                               | 1 Cut                                |  |  |  |  |                                                        |
| 33 | Sausage                                | 1 number<br>(Germany<br>cocktails *) |  |  |  |  |                                                        |
| 34 | Egg                                    | 1 Number                             |  |  |  |  |                                                        |
| 35 | Tripe and Rennet                       | 1 piece                              |  |  |  |  |                                                        |
| 36 | Tongue                                 | 1 whole number                       |  |  |  |  |                                                        |
| 37 | Brain                                  | 1 whole number                       |  |  |  |  |                                                        |
| 38 | Head                                   | 1 palm                               |  |  |  |  |                                                        |
| 39 | Leg                                    | 1 Number                             |  |  |  |  | If certain amount and<br>components is used,<br>noted. |
| 40 | Pizza                                  | 1 number                             |  |  |  |  |                                                        |
| 41 | Low-fat milk (less<br>than 2%)         | 1 cup                                |  |  |  |  |                                                        |
| 42 | Whole milk (greater<br>or equal to 2%) | 1 cup                                |  |  |  |  |                                                        |
| 43 | Chocolate milk                         | 1 cup                                |  |  |  |  |                                                        |
| 44 | Ooze Yogurt                            | 1 tablespoon                         |  |  |  |  |                                                        |
| 45 | Regular yogurt                         | 1 Bowl/cup                           |  |  |  |  |                                                        |
| 46 | Full fat yogurt                        | 1 Bowl/cup                           |  |  |  |  |                                                        |
| 47 | Cheese                                 | 1 pat                                |  |  |  |  |                                                        |
| 48 | Cream cheese                           | 1 pat                                |  |  |  |  |                                                        |
| 49 | Dough                                  | 1 cup                                |  |  |  |  |                                                        |
| 50 | Cream                                  | 1 tablespoon                         |  |  |  |  |                                                        |
| 51 | Traditional ice<br>cream               | Half cup                             |  |  |  |  | how months of year?                                    |
| 52 | Non-traditional ice<br>cream           | 1 number                             |  |  |  |  | how months of year?                                    |
| 53 | Butter                                 | 1 pat                                |  |  |  |  |                                                        |
| 54 | Margarine                              | 1 pat                                |  |  |  |  |                                                        |
| 55 | Dried whey                             | 1 tablespoon                         |  |  |  |  |                                                        |
| 56 | Shredded lettuce                       | 1 cup                                |  |  |  |  |                                                        |
| 57 | Tomato                                 | 1 medium                             |  |  |  |  |                                                        |
| 58 | Cucumber                               | 1 medium                             |  |  |  |  |                                                        |
| 59 | Fresh Herbs                            | 1 small plate                        |  |  |  |  |                                                        |
| 60 | Cooked vegetables                      | 1 cup                                |  |  |  |  |                                                        |

|     |                        |                |  |  |  |  |                     |
|-----|------------------------|----------------|--|--|--|--|---------------------|
|     | (soup, rice, etc.)     |                |  |  |  |  |                     |
| 61  | Pumpkin                | 1 medium       |  |  |  |  |                     |
| 62  | Stewed pumpkin         | 1 medium       |  |  |  |  |                     |
| 63  | Baked Eggplant         | 1 medium       |  |  |  |  |                     |
| 64  | Boiled Celery          | 1 cup          |  |  |  |  |                     |
| 65  | Green peas cooked      | 1 cup          |  |  |  |  |                     |
| 66  | Green beans cooked     | 1 cup          |  |  |  |  |                     |
| 67  | Raw carrots            | 1 medium       |  |  |  |  |                     |
| 68  | Cooked carrots         | 1 medium       |  |  |  |  |                     |
| 69  | Garlic                 | 1 clove        |  |  |  |  |                     |
| 70  | Raw onion              | 1 small        |  |  |  |  |                     |
| 71  | Fried onions           | 1 tablespoon   |  |  |  |  |                     |
| 72  | Cabbage varieties      | 1 Bowl/cup     |  |  |  |  |                     |
| 73  | Bell peppers           | 1 medium       |  |  |  |  |                     |
| 74  | Cooked spinach         | 1 cup          |  |  |  |  |                     |
| 75  | Turnip                 | 1 medium       |  |  |  |  |                     |
| 76  | Small green pepper     | 1 medium       |  |  |  |  |                     |
| 77  | ketchup                | 1 tablespoon   |  |  |  |  |                     |
| 78  | Pickles                | 1 cup          |  |  |  |  | how months of year? |
| 79  | SHOOR                  | 1 cup          |  |  |  |  | how months of year? |
| 80  | Pickled cucumber       | 1 medium       |  |  |  |  |                     |
| 81  | Cantaloupe             | 1/4 number     |  |  |  |  |                     |
| 82  | Melon                  | 1 medium slice |  |  |  |  |                     |
| 83  | Watermelon             | 1 medium slice |  |  |  |  |                     |
| 84  | Pear                   | 1 medium       |  |  |  |  |                     |
| 85  | Apricot                | 1 medium       |  |  |  |  |                     |
| 86  | Cherries               | 1 small plate  |  |  |  |  |                     |
| 87  | Apple                  | 1 medium       |  |  |  |  |                     |
| 88  | Peach                  | 1 medium       |  |  |  |  |                     |
| 89  | Nectarines             | 1 medium       |  |  |  |  |                     |
| 90  | Prunus                 | 1 medium       |  |  |  |  |                     |
| 91  | Fresh figs             | 1 medium       |  |  |  |  |                     |
| 92  | Dried figs             | 1 medium       |  |  |  |  |                     |
| 93  | Grape                  | 1 medium bunch |  |  |  |  |                     |
| 94  | Kiwi                   | 1 medium       |  |  |  |  |                     |
| 95  | Grapefruit             | 1 medium       |  |  |  |  |                     |
| 96  | Orange                 | 1 medium       |  |  |  |  |                     |
| 97  | Persimmon              | 1 medium       |  |  |  |  |                     |
| 98  | Tangerine              | 1 medium       |  |  |  |  |                     |
| 99  | Pomegranate            | 1 medium       |  |  |  |  |                     |
| 100 | Date                   | 1 medium       |  |  |  |  |                     |
| 101 | Plums (yellow and red) | 1 medium       |  |  |  |  |                     |
| 102 | Strawberry             | 1 number       |  |  |  |  |                     |

|     |                                        |                |  |  |  |  |       |
|-----|----------------------------------------|----------------|--|--|--|--|-------|
| 103 | Banana                                 | 1 medium       |  |  |  |  |       |
| 104 | Sweet lemon                            | 1 medium       |  |  |  |  |       |
| 105 | Lemon                                  | 1 medium       |  |  |  |  |       |
| 106 | Orange juice                           | 1 cup          |  |  |  |  |       |
| 107 | Apple juice                            | 1 cup          |  |  |  |  |       |
| 108 | Cantaloupe juice                       | 1 cup          |  |  |  |  |       |
| 109 | Raisins                                | 1 tablespoon   |  |  |  |  |       |
| 110 | Fresh berries                          | 1 small plate  |  |  |  |  |       |
| 111 | Dried berries                          | 1 number       |  |  |  |  |       |
| 112 | Dried fruits                           | 1 number       |  |  |  |  |       |
| 113 | Green Olive                            | 1 number       |  |  |  |  |       |
| 114 | Canned fruits                          | 1 can          |  |  |  |  |       |
| 115 | Packaged fruit juices                  | 1 number       |  |  |  |  |       |
| 116 | Solid vegetables oils                  | 1 tablespoon   |  |  |  |  |       |
| 117 | Oil                                    | 1 tablespoon   |  |  |  |  |       |
| 118 | Olive oil                              | 1 tablespoon   |  |  |  |  |       |
| 119 | Ghee                                   | 1 tablespoon   |  |  |  |  |       |
| 120 | Mayonnaise                             | 1 tablespoon   |  |  |  |  |       |
| 121 | Peanut                                 | 1 number       |  |  |  |  |       |
| 122 | Almond                                 | 1 number       |  |  |  |  |       |
| 123 | Walnut                                 | 1 whole number |  |  |  |  |       |
| 124 | Pistachios                             | 1 number       |  |  |  |  |       |
| 125 | Hazelnut                               | 1 number       |  |  |  |  |       |
| 126 | Seeds (watermelon, pumpkin, sunflower) | 1 Bowl/cup     |  |  |  |  |       |
| 127 | Sugar cube, comfit                     | 1 number       |  |  |  |  |       |
| 128 | Sugar                                  | 1 teaspoonful  |  |  |  |  |       |
| 129 | Honey                                  | 1 teaspoonful  |  |  |  |  |       |
| 130 | Jams (by type)                         | 1 tablespoon   |  |  |  |  |       |
| 131 | Industrial Or cola beverages.          | 1 cup          |  |  |  |  |       |
| 132 | Dried sweets                           | 1 medium       |  |  |  |  |       |
| 133 | Cream Sweets                           | 1 medium       |  |  |  |  |       |
| 134 | GAZ                                    | 1 medium       |  |  |  |  |       |
| 135 | SOHAN                                  | 1 Piece        |  |  |  |  |       |
| 136 | Puff                                   | 1 pack         |  |  |  |  |       |
| 137 | Chocolate                              | 1 number       |  |  |  |  |       |
| 138 | Tea                                    | 1 cup          |  |  |  |  |       |
| 139 | Salt                                   | 1 tsp          |  |  |  |  | Type: |
| 140 | Chips                                  | 1 pack         |  |  |  |  |       |
| 141 | Coffee                                 | 1 cup          |  |  |  |  |       |
| 142 | Lemon juice                            | 1 teaspoonful  |  |  |  |  |       |
| 143 | Candy                                  | 1 medium       |  |  |  |  |       |
| 144 | Baked mushrooms                        | Half cup       |  |  |  |  |       |
| 145 | Homemade HALVA                         | 1 tablespoon   |  |  |  |  |       |

|     |                |              |  |  |  |  |  |
|-----|----------------|--------------|--|--|--|--|--|
| 146 | Sesame pudding | 1 tablespoon |  |  |  |  |  |
| 147 | Spices         | 1 tsp        |  |  |  |  |  |

The date of delivery of food questionnaires to residents:

Name of dietitian responsible for completing FFQ:

delivery date to Nutrition expert:
